# Supplementary material
Source: PubMed Central journal article supplement (PMC8930582)
Supplement: NIHMS1767475-supplement-2.pdf [file NIHMS1767475-supplement-2.pdf]

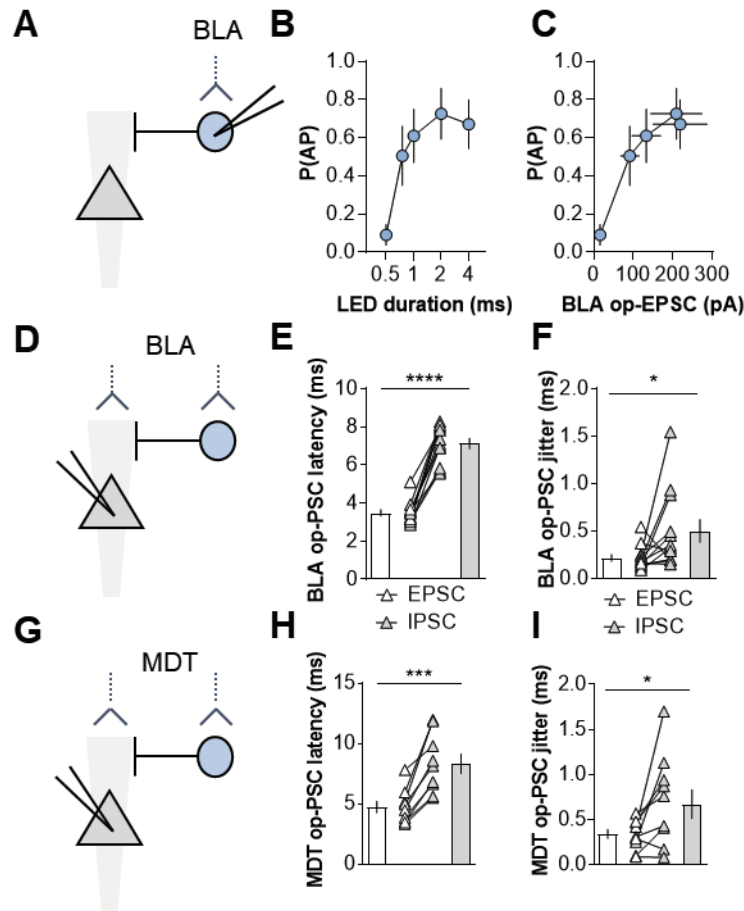

**Figure S1. Related to Figure 2, BLA and MDT inputs to PFC drive feedforward inhibition.**

(A) ChR2 was expressed within the BLA by viral-mediated gene transfer and recordings were made from SST-INs. (B) Optical stimulation of BLA terminals readily elicits SST-IN action potentials (APs) with high probability.  $n/N = 7/4$  cells/mice. (C) BLA op-EPSCs as small as 100 pA readily elicit APs.  $n/N = 7/4$  cells/mice. (D) ChR2 was expressed within the BLA and recordings were made from pyramidal cells. (E) Relative to EPSCs, BLA-driven IPSCs displayed longer onset latency ( $7.1 \pm 0.3$  vs  $3.5 \pm 0.2$  ms;  $t_{11} = 12.76$ , \*\*\*\*:  $p < 0.0001$ , paired t-test) and (F) jitter ( $0.50 \pm 0.12$  vs  $0.21 \pm 0.04$  ms;  $t_{11} = 2.21$ , \*:  $p < 0.05$ , paired t-test).  $n/N = 12/4$  (G) ChR2 was expressed within the MDT and recordings were made from pyramidal cells. (H) MDT-driven IPSCs displayed longer onset latency ( $8.3 \pm 0.8$  vs  $4.8 \pm 0.5$  ms;  $t_8 = 6.24$ , \*\*\*\*:  $p < 0.001$ , paired t-test) and (I) a greater jitter ( $0.67 \pm 0.16$  vs  $0.34 \pm 0.05$  ms;  $t_9 = 2.3$ ,  $p < 0.05$ , paired t-test) than EPSCs.  $n/N = 9-10/3$ .

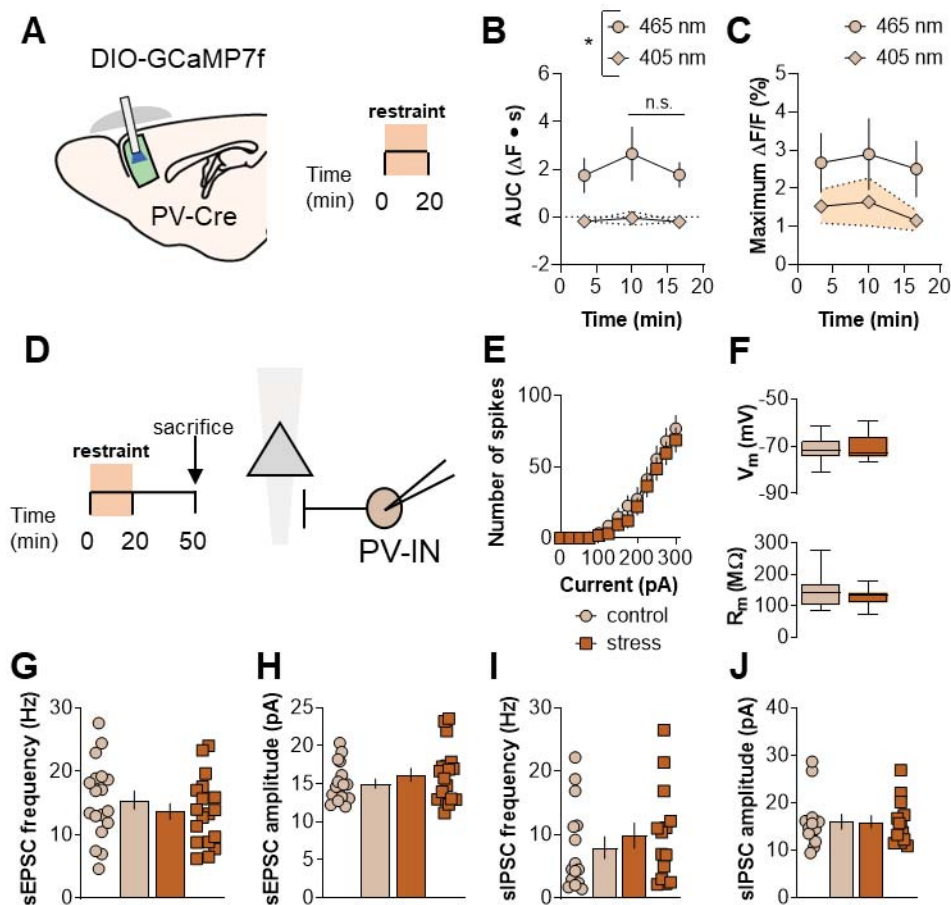

**Figure S2. Related to Figure 3, Parvalbumin-expressing interneuron (PV-IN) function does not adapt during acute stress. (A)** Schematic displaying viral-assisted approach to express GCaMP7f in PV-INs. A virus promoting the expression of a double-inverted open (DIO) reading frame of GCaMP7f was delivered to the PFC of PV-Cre mice and chronically indwelling fiberoptic cannulas were implanted. After 4 weeks recovery, animals underwent 20 minutes restraint stress while interneuron calcium mobilization was measured via fiber photometry. **(B)** PV-GCaMP  $Ca^{2+}$ -dependent signals (465-nm) were readily detected following struggling episodes, but their magnitude assessed by the area under the curve (AUC) did not change during a single exposure to restraint stress (RM Two-way ANOVA time x wavelength interaction:  $F_{2,10}=1.1$ , n.s.; main effect of wavelength:  $F_{1,5}=9.8$ ,  $p<0.03$ ). N=6 mice. Fluorescent signals on the  $Ca^{2+}$ -independent isobestic control channel (405-nm) were not readily detected following

struggling episodes. **(C)** The maximum increase in PV-GCaMP fluorescence locked to struggling episodes was not different than that on the isobestic control channel (RM Two-way ANOVA time x wavelength interaction:  $F_{2,10}=1.1$ , n.s.; main effect of wavelength:  $F_{1,5}=3.1$ , n.s.).  $N=6$ . **(D)** Mice were sacrificed for whole-cell electrophysiology 30 minutes following a single exposure to restraint stress. Recordings were made from PV-INs with soma in layer 5 PFC. **(E)** Restraint stress did not affect the resting membrane potential ( $V_m$ ) or membrane resistance ( $R_m$ ) in PV-INs.  $n/N = 20-23/4$  cells/mice. **(F)** Current-evoked spiking was not different in PV-INs from mice in the control and restraint stress groups.  $n/N = 20-23/4$ . **(G)** sEPSC amplitude in PV-INs was not different between control and restraint stress groups  $n/N = 17-18/4$ . **(H)** Acute stress did not alter PV-IN spontaneous excitatory postsynaptic current (sEPSC) frequency  $n/N = 17-18/4$ . **(I)** Acute stress did not alter PV-IN spontaneous inhibitory postsynaptic current (sIPSC) frequency  $n/N = 13/4$ . **(J)** sIPSC amplitude in PV-INs was not different between control and restraint stress groups  $n/N = 14-15/4$ .

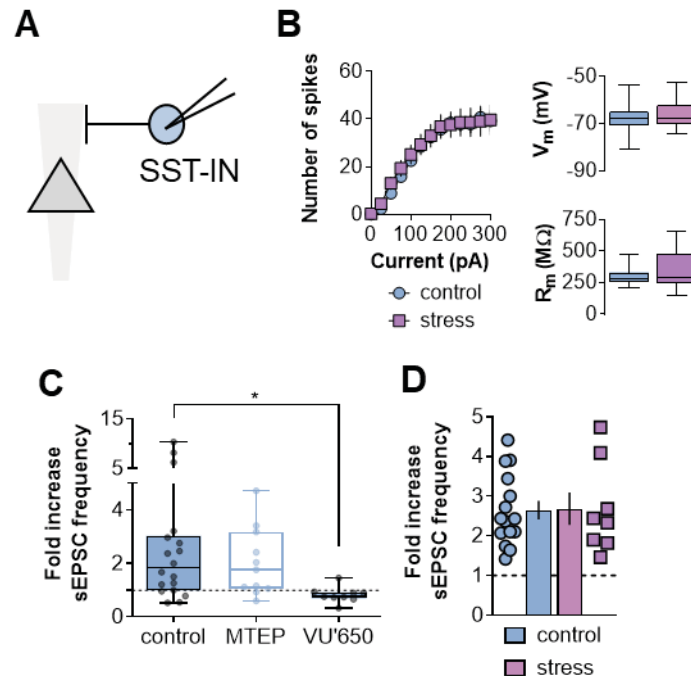

**Figure S3. Related to Figure 3, Stress does not alter SST-IN intrinsic physiology or acute actions of mGlu<sub>1</sub> receptors. (A)** Left, Recordings from fluorescent labeled SST-INs were made following restraint stress and in control mice. **(B)** Left, Current-evoked spiking was not different in SST-INs from mice in the control and stress groups. Right, Restraint stress did not affect the resting membrane potential ( $V_m$ ) or membrane resistance ( $R_m$ ) in SST-INs.  $n/N = 17-24/6-9$  cells/mice. **(C)** During acute application, DHPG (100 $\mu$ M, 10min) increased the frequency of sEPSCs onto SST-INs ( $2.8 \pm 0.65$  fold). The increase in sEPSC frequency was blocked by the mGlu<sub>1</sub> NAM VU'650 (10 $\mu$ M) but not the mGlu<sub>5</sub> NAM MTEP (3 $\mu$ M) (One-way ANOVA main effect of NAM:  $F_{2,35}=11.4$ ,  $p < 0.08$ ; \*:  $p < 0.05$ , Sidak test).  $n/N=9-18/4-7$ . **(D)** DHPG-induced increases in sEPSC frequency were not different between SST-INs from the control and restraint stress groups.  $n/N=8-15/6-7$ .

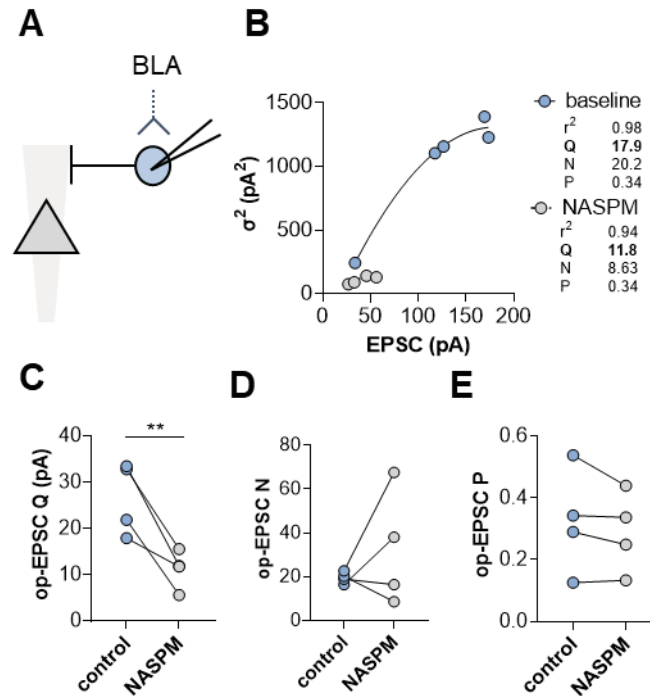

**Figure S4. Related to Figure 5, Selective reduction in BLA op-EPSC Q following NASPM administration. (A)** ChR2 was expressed in the BLA and recordings were made from layer 5 SST-INs in PL PFC. **(B)** Representative MPFA experiment. For each cell, op-EPSC amplitude and standard deviation ( $\sigma$ ) were obtained across a range of light stimulation durations. A quadratic equation was fit to the op-EPSC amplitude and variance ( $\sigma^2$ ) at baseline and in the presence of NASPM (200 $\mu$ M, 15min). The quantal size (Q), number of synapses (N), and glutamate release probability (P), can be derived from the curve fit parameters. **(C)** NASPM reduced quantal size on SST-INs (11.1 $\pm$ 3.2 vs 26.5 $\pm$ 3.9pA;  $t_3=4.7$ ,  $p<0.02$ , t-test). n/N = 4/3 cells/mice. **(D)** NASPM did not affect N at BLA inputs onto SST-INs. **(E)** P from BLA to SST-INs was not affected by NASPM.

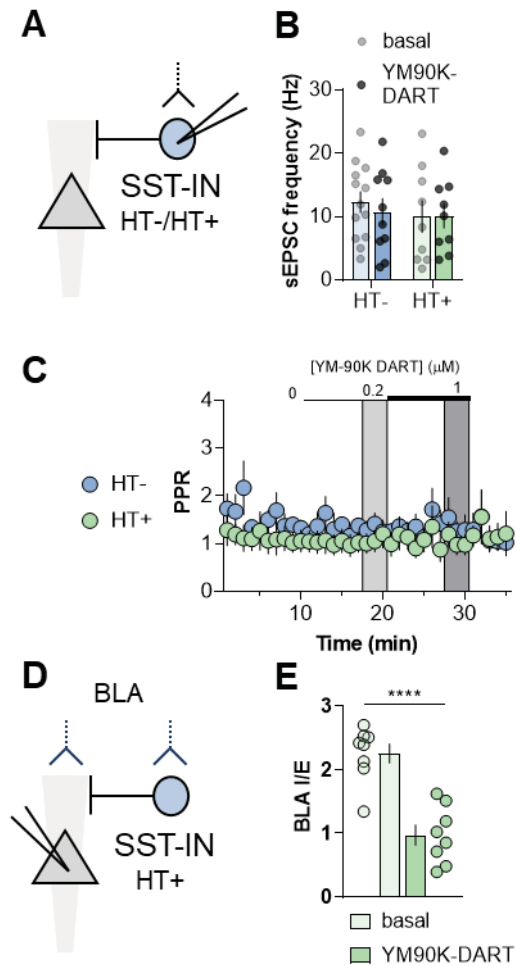

**Figure S5. Related to Figure 5, YM90K DART administration attenuates BLA-elicited feedforward inhibition without affecting presynaptic release parameters on SST-INs . (A)** DART was deployed by viral-mediated expression of the HaloTag protein (HT+), or an inactive mutant variant (HT-), selectively in PFC SST-INs. Both constructs also expressed tdTomato to allow for visualization and cellular targeting. **(B)** No effect of YM90K DART application on sEPSC frequency in either HT- or HT+ SST-INs.  $n/N=9-13/3-4$  cells/mice. **(C)** The AMPA receptor antagonist YM90K DART did not affect PPR of electrically evoked EPSCs on SST-INs.  $n/N=4-5/3-4$ . **(D)** HT+ was expressed in PFC SST-INs, ChR2 was expressed in BLA terminals, and BLA op-EPSCs and disynaptic op-IPSCs were recorded from pyramidal cells. **(E)** The amplitude ratio of BLA op-IPSCs relative to op-EPSCs (I/E) was decreased by YM90K-DART ( $2.3 \pm 0.2$  vs  $1.0 \pm 0.2$ ;  $t_{14}=5.83$ , \*\*\*\*:  $p<0.0001$ , t-test).  $n/N=8/3$ .

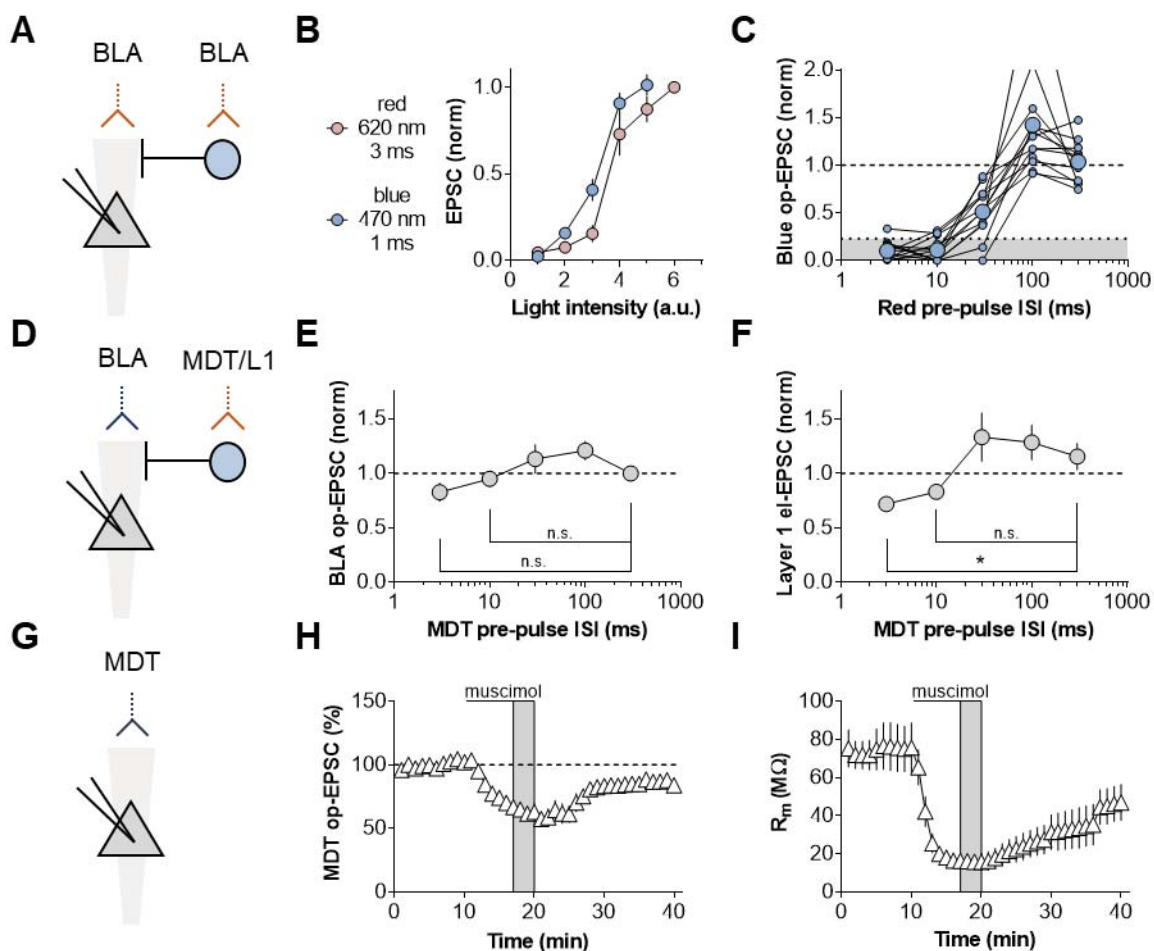

**Figure S6. Related to Figure 5, Control experiments supporting BLA-driven**

**heterosynaptic shunting inhibition. (A)** Chrimson was expressed in the BLA without any expression of ChR2. **(B)** Stimulation with either blue (470nm, 1ms) or red (620nm, 3ms) light readily evoked EPSCs in PFC pyramidal cells.  $n/N = 8/3$  cells/mice. For experiments utilizing both Chrimson and ChR2, red light stimulation was saturating, and blue light was kept below 2 a.u. for experiments in the main body of the manuscript. **(C)** The intensity of blue light was increased to 4-5 a.u. to evoke comparable EPSCs as red. Short-latency red light pre-pulses (3-10ms) prevented any subsequent BLA op-EPSCs evoked via blue light stimulation, suggesting spectral overlap is unlikely to contribute to blue light EPSCs in dual opsin experiments.  $n/N = 12/4$ . **(D)** A dual opsin strategy was employed to evaluate interactions between BLA and MDT inputs on isolated pyramidal cells. The red-shifted opsin Chrimson was expressed in the MDT

and ChR2 was expressed in the BLA. Red light stimulation preceded blue light stimulation. **(E)** Prior stimulation of MDT terminals did not decrease the amplitude of subsequent BLA op-EPSCs (RM One-way ANOVA main effect of ISI:  $F_{4,44}=5.1$ ,  $p<0.01$ ; n.s. Sidak tests vs 300ms).  $n/N=12/3$  cells/mice. **(F)** Prior stimulation of MDT terminals decreased the amplitude of EPSCs evoked with L1 electrical stimulation 3-ms later but not at 10-ms pre-pulse ISIs associated with SST-IN disynaptic inhibition. (RM One-way ANOVA main effect of ISI:  $F_{4,36}=6.76$ ,  $p<0.001$ ; \*: $p<0.05$ . Sidak tests vs 300ms).  $n/N=10/5$  cells/mice. **(G)** ChR2 was expressed in the MDT and recordings were made from pyramidal cells. **(H)** The GABA<sub>A</sub> receptor agonist muscimol (10 $\mu$ M, 10min) depressed the amplitude of MDT op-EPSCs ( $63.2\pm 6.2\%$  baseline) **(I)** concomitant with a reduction in  $R_m$  ( $21.6\pm 5.8\%$  baseline).  $n/N = 5/2$ .



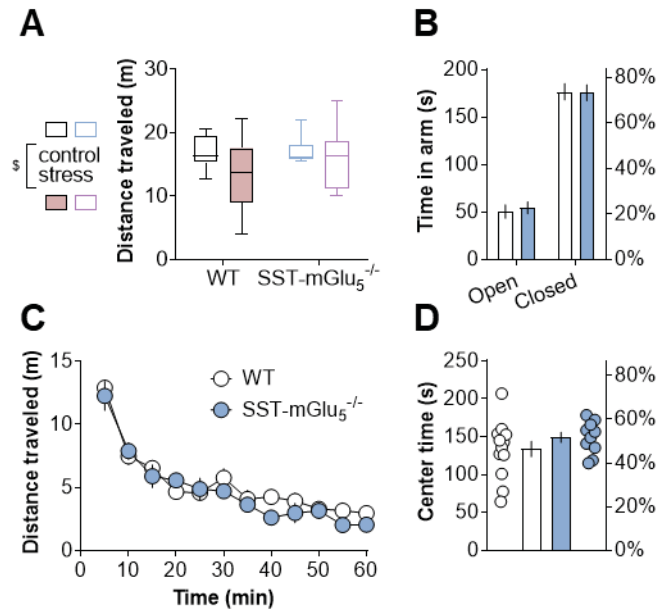

**Figure S7. Related to Figure 8, WT and SST-mGlu<sub>5</sub><sup>-/-</sup> mice display comparable locomotor behavior. (A)** Trend decrease in locomotor activity in the Y-maze apparatus following restraint stress, but no main effect of genotype or interaction (Two-way ANOVA stress x KO interaction:  $F_{1,38}=1.0$ , n.s.; main effect of stress:  $F_{1,38}=6.1$ ,  $p<0.07$ ). N=10-12 mice per group. **(B)** No genotypic difference was detected in the proportion of time spent in the open arms of an elevated zero-maze. N=10-13. **(C)** SST mGlu<sub>5</sub><sup>-/-</sup> mice displayed typical locomotor activity in a novel environment. N=10-13. **(D)** No difference in the proportion of time spent in the center of the open field during the first 5 minutes of the test. N=10-13.

**Supplemental Table 1. Related to Figure 1, Membrane physiology parameters characterizing LTS SST-INs**

| Parameter     | Unit       | Cell type | Mean  | SEM   | t(32) | p    |
|---------------|------------|-----------|-------|-------|-------|------|
| $V_m$         | mV         | LTS       | -63.3 | 1.6   | 4.7   | **** |
|               |            | FSL       | -76.3 | 1.2   |       |      |
| $R_m$         | M $\Omega$ | LTS       | 411   | 24    | 5.9   | **** |
|               |            | FSL       | 171   | 18    |       |      |
| rebound sag   | -          | LTS       | 0.063 | 0.008 | 2.6   | *    |
|               |            | FSL       | 0.027 | 0.005 |       |      |
| rheobase      | pA         | LTS       | 30    | 3     | 6.9   | **** |
|               |            | FSL       | 139   | 27    |       |      |
| max frequency | Hz         | LTS       | 44    | 4     | 8.7   | **** |
|               |            | FSL       | 119   | 9     |       |      |

FSL, fast-spiking-like; LTS, low-threshold-spiking;  $R_m$ , membrane resistance;  $V_m$ , resting membrane potential

**Supplemental Table 2. Related to Figures 1, 2, 3, 5, 6, 7;  
Amplitudes of EPSCs for normalized data sets**

| Cell type      | Input          | Panel          | Condition   | Mean      | SEM  | n cells   | N ♀ | N ♂     |     |     |
|----------------|----------------|----------------|-------------|-----------|------|-----------|-----|---------|-----|-----|
| SST-IN         | electrical     | 1E             | K-gluconate | 86        | 19   | 12        | 6   | 5       |     |     |
|                |                | 1F             | VU'650      | 51        | 14   | 8         | 3   | 4       |     |     |
|                |                |                | MTEP        | 54        | 15   | 8         | 3   | 4       |     |     |
|                |                | 1J             | BAPTA       | 46        | 7    | 5         | 3   | 1       |     |     |
|                |                | 3I             | control     | 52        | 13   | 12        | 4   | 6       |     |     |
|                |                |                | stress      | 89        | 25   | 8         | 2   | 2       |     |     |
|                |                | 3L             | control     | 113       | 20   | 7         | 2   | 4       |     |     |
|                |                |                | stress      | 103       | 21   | 7         | 1   | 4       |     |     |
|                | 5E             | HT-            | 91          | 19        | 4    | 0         | 3   |         |     |     |
|                |                | HT+            | 75          | 9         | 5    | 0         | 4   |         |     |     |
|                | 7D             | WT             | 103         | 32        | 6    | 1         | 2   |         |     |     |
|                |                | KO             | 113         | 16        | 5    | 1         | 1   |         |     |     |
|                | BLA            | 2D             | -           | 150       | 36   | 4         | 1   | 3       |     |     |
|                |                | 2G             | control     | 168       | 54   | 8         | 2   | 3       |     |     |
| MTEP           | 245            |                | 70          | 5         | 2    | 1         |     |         |     |     |
| MDT            | 2D             | -              | 302         | 91        | 5    | 1         | 3   |         |     |     |
|                | 2H             | -              | 201         | 92        | 7    | 1         | 2   |         |     |     |
|                |                |                |             | EPSC (pA) |      | IPSC (pA) |     |         |     |     |
|                | Input          | Panel          | Condition   | Mean      | SEM  | Mean      | SEM | n cells | N ♀ | N ♂ |
| pyramidal cell | electrical     | 5C / 5L        | K-gluconate | 210       | 40   | -         | -   | 9       | 2   | 2   |
|                |                | 5C             | picrotoxin  | 388       | 158  | -         | -   | 8       | 2   | 1   |
|                |                | 5I             | basal       | 191       | 69   | -         | -   | 8       | 3   | 0   |
|                |                |                | YM90K-DART  | 247       | 89   | -         | -   | 7       | 3   | 0   |
|                | S4             | MDT-elec study | 162         | 42        | -    | -         | 11  | 1       | 4   |     |
|                | BLA            | 2K             | basal       | 469       | 97   | 449       | 97  | 9       | 0   | 3   |
|                |                |                | post DHPG   | 391       | 41   | 728       | 132 | 9       | 0   | 3   |
|                |                | 5C / 5L        | K-gluconate | 224       | 30   | -         | -   | 9       | 2   | 2   |
|                |                |                | picrotoxin  | 216       | 50   | -         | -   | 8       | 2   | 1   |
|                |                | 5K             | K-gluconate | 271       | 47   | -         | -   | 16      | 2   | 3   |
|                |                |                | picrotoxin  | 206       | 44   | -         | -   | 5       | 2   | 0   |
|                |                | 5L             | stress      | 190       | 36   | -         | -   | 10      | 2   | 1   |
|                |                | 6F / 6H        | control     | 224       | 42   | 340       | 70  | 8       | 0   | 3   |
|                | stress         |                | 295         | 51        | 1089 | 190       | 8   | 0       | 3   |     |
|                | S6             | HT+ baseline   | 317         | 52        | 664  | 157       | 9   | 3       | 0   |     |
|                |                | HT+ YM90-K     | 340         | 72        | 352  | 100       | 8   | 3       | 0   |     |
|                | MDT            | 2L             | basal       | 334       | 98   | 918       | 244 | 6       | 1   | 3   |
|                |                |                | post DHPG   | 629       | 174  | 1276      | 194 | 8       | 1   | 3   |
|                |                | 5K / 5L        | control     | 175       | 28   | -         | -   | 16      | 2   | 3   |
|                |                |                | stress      | 304       | 125  | -         | -   | 10      | 2   | 1   |
| 6K / 6M        |                | control        | 241         | 32        | 871  | 166       | 10  | 0       | 3   |     |
|                | stress         | 246            | 60          | 893       | 244  | 10        | 0   | 3       |     |     |
| S4             | MDT-elec study | 222            | 34          | -         | -    | 11        | 1   | 4       |     |     |
